# Supplementary material for: Continued Postnatal Administration of Resveratrol Prevents Diet-Induced Metabolic Syndrome in Rat Offspring Born Growth Restricted
Source: PubMed Central journal article supplement — Diabetes. 2011 Aug 20;60(9):2274–84. doi: 10.2337/db11-0374 (PMC3161324; doi:10.2337/db11-0374), 2011-08-20
Supplement: supp_db11-0374_DB110374SupplementaryData.pdf [file supp_db11-0374_DB110374SupplementaryData.pdf]

SUPPLEMENTARY DATA

**Supplementary Table 1. Organ and fat depot weights in control and IUGR rats fed high fat diet with or without resveratrol (Resv).**

|                                                              | High fat diet |              | High fat diet + Resv |              | 2-way ANOVA |      |     |
|--------------------------------------------------------------|---------------|--------------|----------------------|--------------|-------------|------|-----|
|                                                              | Control       | IUGR         | Control              | IUGR         | IUGR        | Resv | Int |
| Liver weight (g)                                             | 22.8 ± 1.6    | 21.3 ± 1.1   | 21.4 ± 1.5           | 19.9 ± 1.3   |             |      |     |
| Liver relative weight (mg • g body weight <sup>-1</sup> )    | 33.4 ± 1.1    | 32.6 ± 1.5   | 32.8 ± 0.7           | 32.5 ± 1.0   |             |      |     |
| Heart weight (g)                                             | 2.68 ± 0.11   | 2.71 ± 0.10  | 2.58 ± 0.08          | 2.46 ± 0.09  |             |      |     |
| Heart relative weight (mg • g body weight <sup>-1</sup> )    | 3.98 ± 0.22   | 4.15 ± 0.26  | 4.00 ± 0.13          | 4.07 ± 0.25  |             |      |     |
| Pancreas weight (g)                                          | 1.36 ± 0.03   | 1.15 ± 0.08  | 1.26 ± 0.07          | 1.30 ± 0.16  |             |      |     |
| Pancreas relative weight (mg • g body weight <sup>-1</sup> ) | 2.02 ± 0.1    | 1.76 ± 0.13  | 1.96 ± 0.14          | 2.13 ± 0.27  |             |      |     |
| Spleen weight (g)                                            | 0.95 ± 0.05   | 1.01 ± 0.07  | 0.94 ± 0.05          | 0.92 ± 0.05  |             |      |     |
| Spleen relative weight (mg • g body weight <sup>-1</sup> )   | 1.4 ± 0.08    | 1.54 ± 0.09  | 1.45 ± 0.03          | 1.51 ± 0.07  |             |      |     |
| Kidneys weight (g)                                           | 4.08 ± 0.14   | 3.58 ± 0.08† | 3.84 ± 0.09          | 3.30 ± 0.08† | *           | *    |     |
| Kidneys relative weight (mg • g body weight <sup>-1</sup> )  | 6.02 ± 0.15   | 5.48 ± 0.16  | 5.95 ± 0.22          | 5.43 ± 0.18  | *           |      |     |
| Intra-abdominal fat (g)                                      | 73.0 ± 5.9    | 89.2 ± 5.5†  | 55.38 ± 2.18         | 64.9 ± 4.8†  | *           | *    |     |
| Intra-abdominal to total fat (%)                             | 53.3 ± 3.9    | 63.0 ± 4.1†  | 48.8 ± 5.9           | 53.6 ± 5.7   | *           | *    |     |
| Omental fat (g)                                              | 2.95 ± 0.58   | 3.52 ± 0.48  | 2.44 ± 0.50          | 1.78 ± 0.18  |             | *    | *   |
| Retroperitoneal fat (g)                                      | 35.9 ± 3.5    | 44.5 ± 3.6†  | 23.4 ± 1.0           | 28.7 ± 2.8†  | *           | *    |     |
| Epididymal fat (g)                                           | 16.2 ± 1.6    | 24.5 ± 1.7†  | 18.43 ± 2.33         | 18.8 ± 1.3   |             |      |     |
| Mesenteric fat (g)                                           | 16.2 ± 2.8    | 14.4 ± 1.2   | 10.2 ± 0.6           | 14.3 ± 1.3   |             |      | *   |
| Subdiafragmatic fat (g)                                      | 1.6 ± 0.2     | 2.3 ± 0.2†   | 1.0 ± 0.1            | 1.3 ± 0.2    | *           | *    |     |

Measurements were made after nine weeks of HF: High fat diet with or without resveratrol (Resv) 4 g/Kg of diet, \* p<0.05 for the respective source of variation such as intrauterine growth restriction (IUGR), Resv or their interaction (Int) using two-way ANOVA. † p<0.05 vs. Controls receiving the same diet after a Bonferroni post-hoc test (n=6 per group).

SUPPLEMENTARY DATA

**Supplementary Figure 1. Experimental design and assignment of experimental groups. Following exposure to a normoxic (21% O<sub>2</sub>; Control) or a hypoxic (11.5% O<sub>2</sub>) prenatal environment that caused intrauterine growth restriction (IUGR) weaned male offspring were randomized to either high fat diet (HF-C) or high-fat diet supplemented with Resv 4 g/Kg of diet (HF-R). n= number of litters/dams in each group, N= number of offspring in each group.**

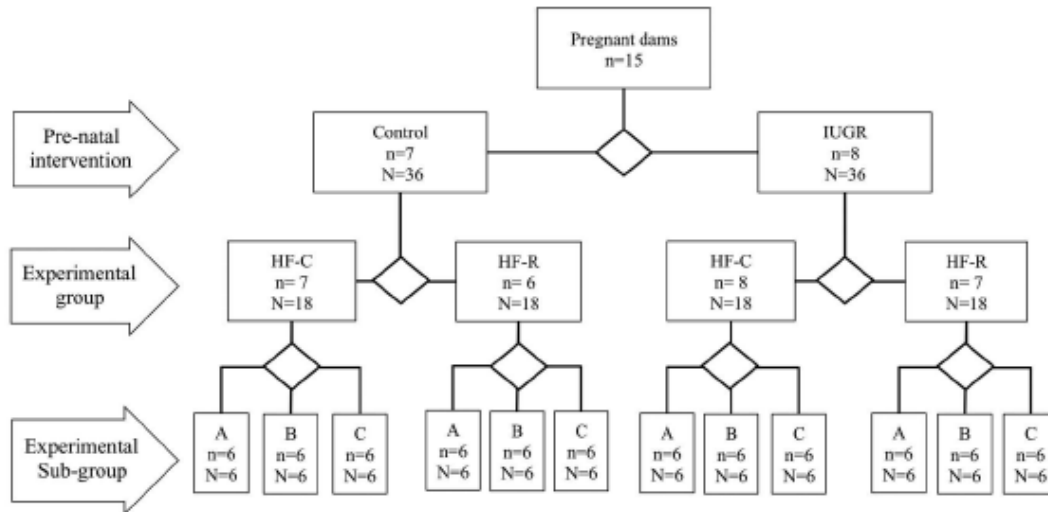

| Determination                                    | Experimental sub-groups |   |   |
|--------------------------------------------------|-------------------------|---|---|
|                                                  | A                       | B | C |
| Body weight and food consumption                 | x                       | x | x |
| Determination of body composition and adiposity  | x                       |   |   |
| Insulin signaling studies                        |                         | x |   |
| Fat histology                                    | x                       |   |   |
| Determination of liver, muscle and plasma lipids | x                       |   | x |
| Indirect calorimetry and physical activity       |                         |   | x |
| Glucose and insulin tolerance tests              |                         | x |   |
